# Supplementary material for: Oropouche virus disrupts neurodevelopment and is vertically transmitted
Source: Research Square preprint supplement (doi:10.21203/rs.3.rs-7512609/v1), 2025-09-09
Supplement: Supplementary file 1 [file ca43317cfc19fb090e7fc62d.pdf]

Supplementary Figure 1: Neuronal cell types in 15- and 35-DIV forebrain organoids

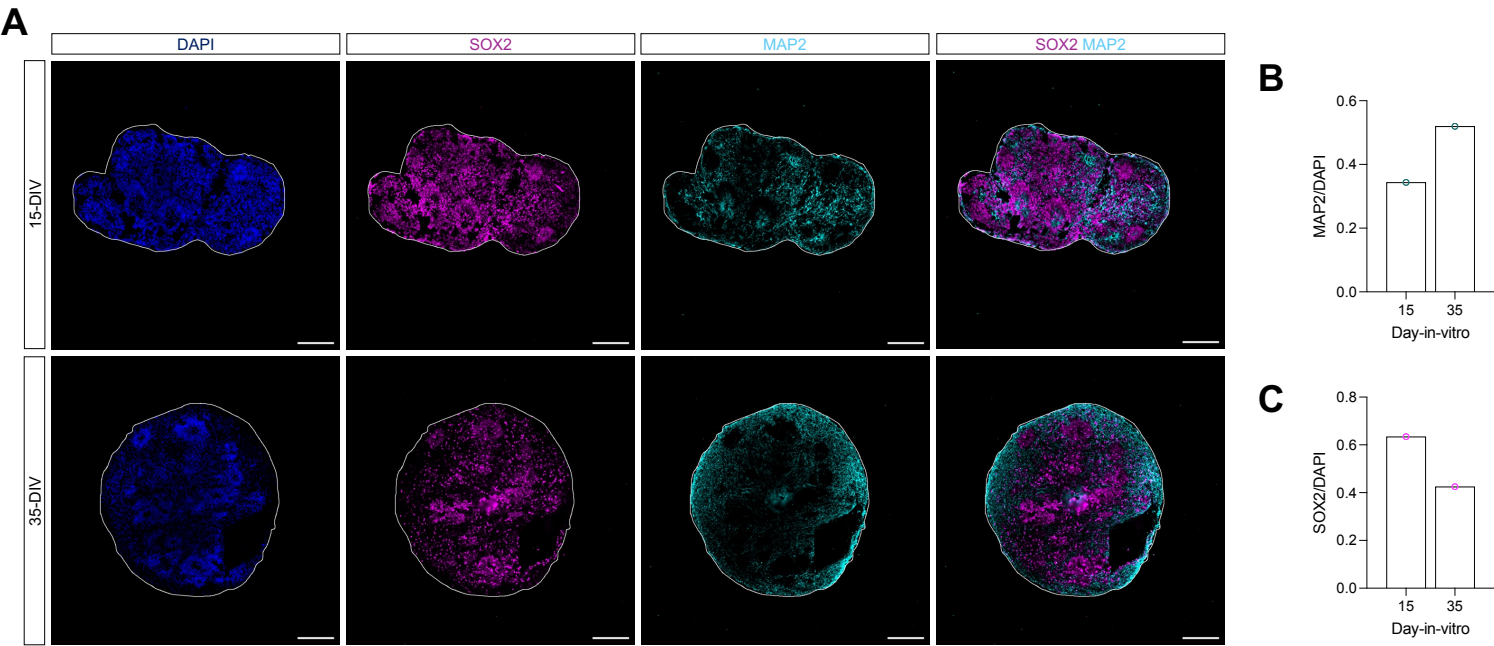

**Supplementary Figure 1: Neuronal cell types in 15- and 35-DIV forebrain organoids. (A)** Representative immunofluorescent images of DIV15 and DIV35 forebrain organoids. Sectioned organoids were outlined using DAPI (*blue*) and stained for SOX2 (*magenta*) and MAP2 (*cyan*). Scale bars of whole organoids = 200  $\mu$ m. Quantification of **(A)** MAP2+ or **(C)** SOX2+ organoid area relative to DAPI+ region. Data presented as means  $\pm$  SEM ( $n = 1$  organoid,  $N = 1$  organoid).

Supplementary Figure 2: OROV infection induces cell death in organoids

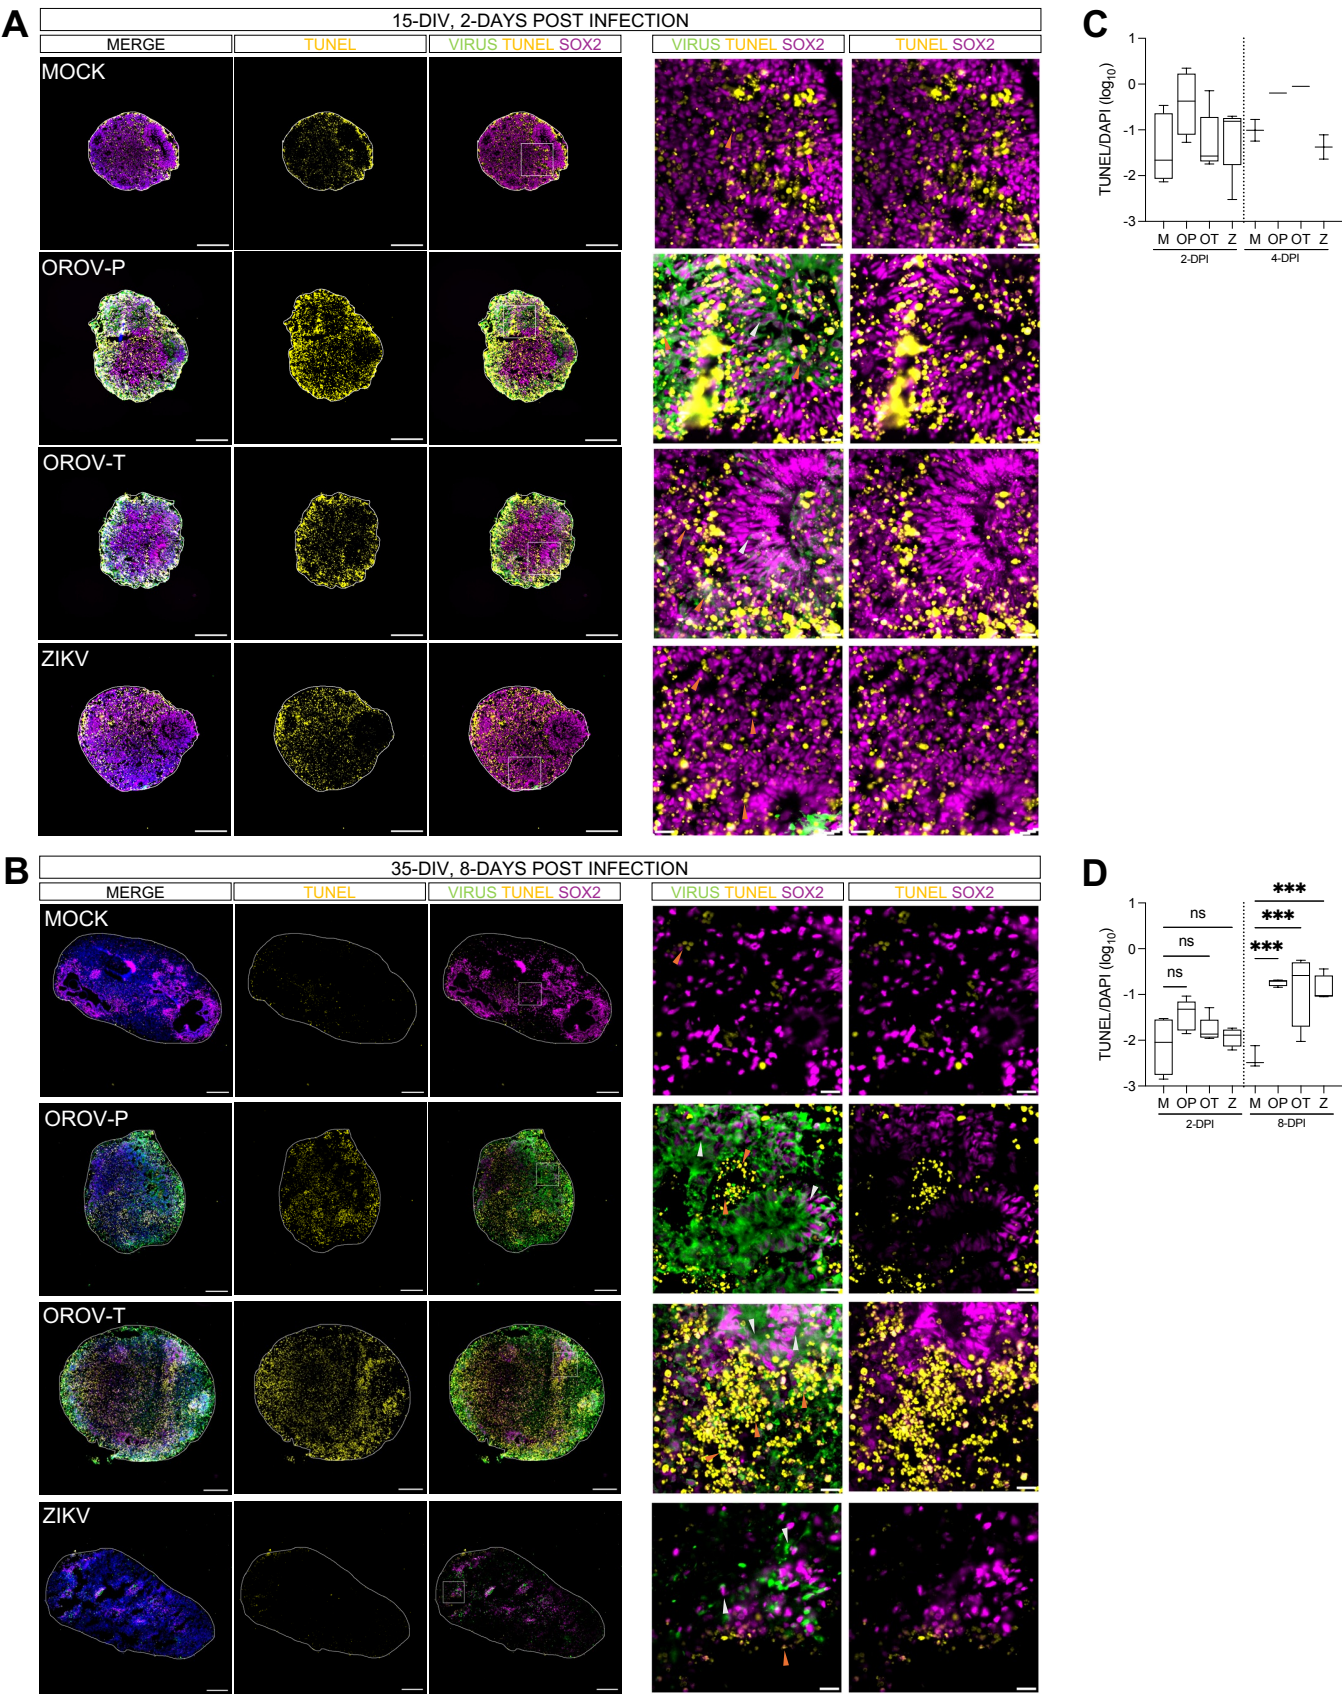

Supplementary Figure 3: High levels of OROV RNA are needed to detect infectious virus

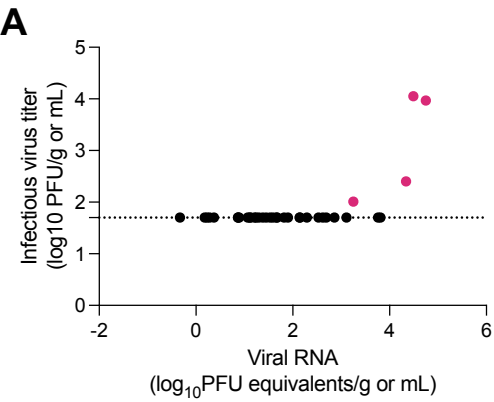

**Supplementary Figure 3: High levels of OROV RNA are needed to detect infectious virus. (A)** Viral RNA and viral titers, quantified via RT-qPCR and plaque assay respectively, from fetal heads and placentas were represented in a correlation plot. Pink dots indicate samples with detectable viral plaques (n>14 samples, N=4 independent experiments).
